# Supplementary material for: RbfA and IF3 couple ribosome biogenesis and translation initiation to increase stress tolerance
Source: PubMed Central journal article supplement — Nucleic Acids Res. 2019 Nov 15;48(1):359–72. doi: 10.1093/nar/gkz1065 (PMC7145577; doi:10.1093/nar/gkz1065), 2019-11-15
Supplement: gkz1065_supplemental_file.pdf [file gkz1065_supplemental_file.pdf]

Supplement to

**RbfA and IF3 couple ribosome biogenesis and translation initiation to increase stress tolerance**

Indra Mani Sharma and Sarah A. Woodson\*

T. C. Jenkins Department of Biophysics, Johns Hopkins University, 3400 N. Charles St.,  
Baltimore, MD 21218, USA

One (1) Table and eight (8) figures associated with main figures and discussion.

**Table S1.** List of strains, plasmids, and oligonucleotides used in this study.**Bacterial strains**

|                                                               |                       |             |
|---------------------------------------------------------------|-----------------------|-------------|
| <i>E. coli</i> MRE600                                         | Lab stock             | N/A         |
| <i>E. coli</i> BL21 (DE3)                                     | New England Biolabs   | Cat# C2527H |
| <i>E. coli</i> BX41 ( $\Delta$ <i>rbfA</i> )                  | (1)                   | N/A         |
| <i>E. coli</i> $\Delta$ <i>rsgA</i>                           | (2, 3)                | N/A         |
| <i>E. coli</i> BW25113                                        | CGSC, Yale University | CGSC#7636   |
| <i>E. coli</i> JW0050-3 ( $\Delta$ <i>ksgA</i> )              | (2)                   | CGSC#8292   |
| <i>E. coli</i> TPR201                                         | (4)                   | CGSC#8265   |
| <i>E. coli</i> JK382 (parental)                               | (5)                   | CGSC#7503   |
| <i>E. coli</i> JK378 ( <i>infC362</i> )                       | (5)                   | CGSC#7501   |
| <i>E. coli</i> WTZ19001 ( <i>JK378</i> $\Delta$ <i>rsgA</i> ) | This study            | CGSC#14233  |

**Plasmids**

|                         |            |     |
|-------------------------|------------|-----|
| pET21b-RbfA-A2C         | GenScript  | N/A |
| p15BHA                  | (6)        | N/A |
| p15B-RbfA-A2C-HA        | This study | N/A |
| pMW118                  | (7)        | N/A |
| pMWrbfA <sup>+</sup>    | (7)        | N/A |
| pGEMX2His-RsgA          | (7)        | N/A |
| pD421-rsgA              | Lab stock  | N/A |
| pProEx-HTb-IF1          | (8)        | N/A |
| pET24b-IF2              | (9)        | N/A |
| pProEx-HTb-IF3          | (8)        | N/A |
| pProEx-HTb-IF3-K110L    | This study | N/A |
| pProEx-HTb-IF3-Nter     | This study | N/A |
| pProEx-HTb-IF3-Cter     | This study | N/A |
| IF3.C65S.S38C.K97C      | (10)       | N/A |
| IF3-Y75N.C65S.S38C.K97C | (10)       | N/A |

**Oligonucleotides**

|              |      |     |
|--------------|------|-----|
| Primer 161   | (11) | N/A |
| Primer 323   | (11) | N/A |
| Primer 1523  | (12) | N/A |
| Primer-5'end | (13) | N/A |
| Primer-3'end | (14) | N/A |
| Cy3-SA5      | (15) | N/A |

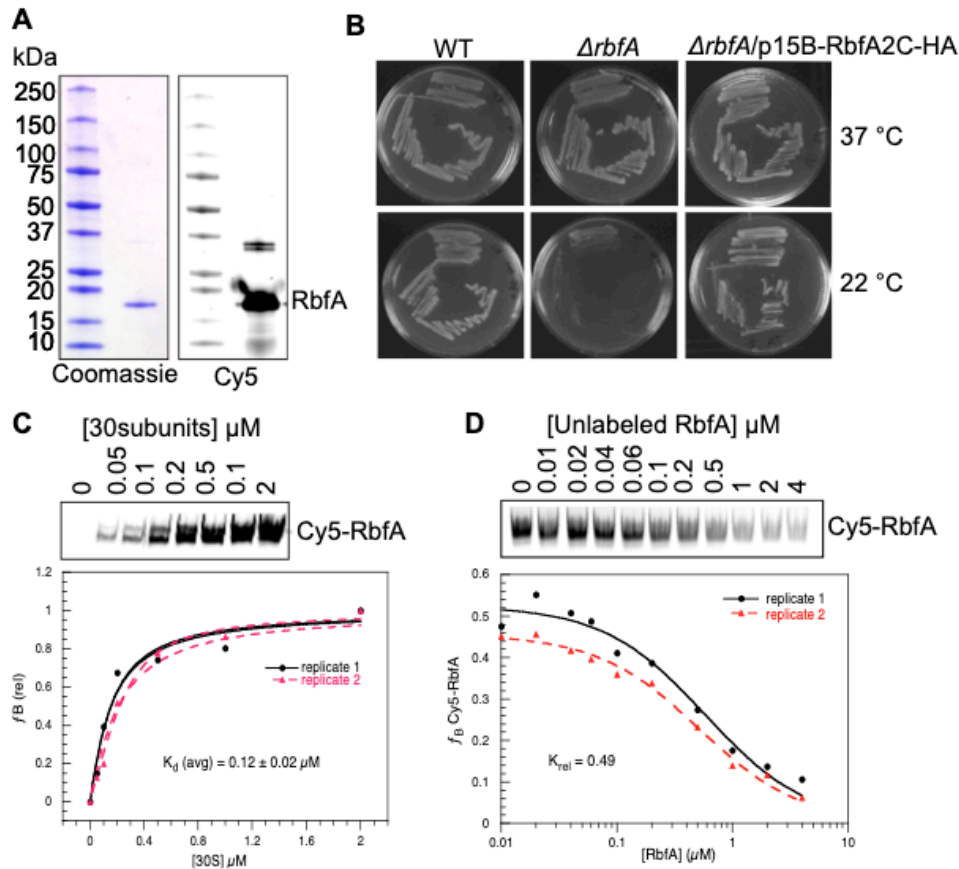

### Figure S1. Preparation of Cy5-labeled RbfA.

(A) 4-20% SDS PAGE showing the purity of RbfA:A2C protein after labeling with Cy5-maleimide. (B) The *in vivo* function of RbfA:A2C was tested by complementation of the cold sensitive phenotype of BX41  $\Delta rbfA$  strain by expression of the *rbfA*:A2C mutant from plasmid p15B-RbfA2C-HA. The mutant RbfA was able to restore growth at 22 °C, comparable to an *rbfA*<sup>+</sup> *E. coli* strain (MRE600). (C) Equilibrium binding of 100 nM Cy5-RbfA with 30S subunits, fit to a quadratic form of a single-site binding isotherm. (D) Competition between unlabeled RbfA and 40 nM Cy5-RbfA for a binding site on 0.17  $\mu M$  30S subunits. The fluorescence intensity was scaled to the fraction of Cy5-RbfA bound in the absence of competitor, assuming  $K_d$  for Cy5-RbfA = 0.12  $\mu M$ .  $K_{rel} = 0.49 \pm 0.09$  for two independent trials. Both (C) and (D) were performed by native 4% PAGE.

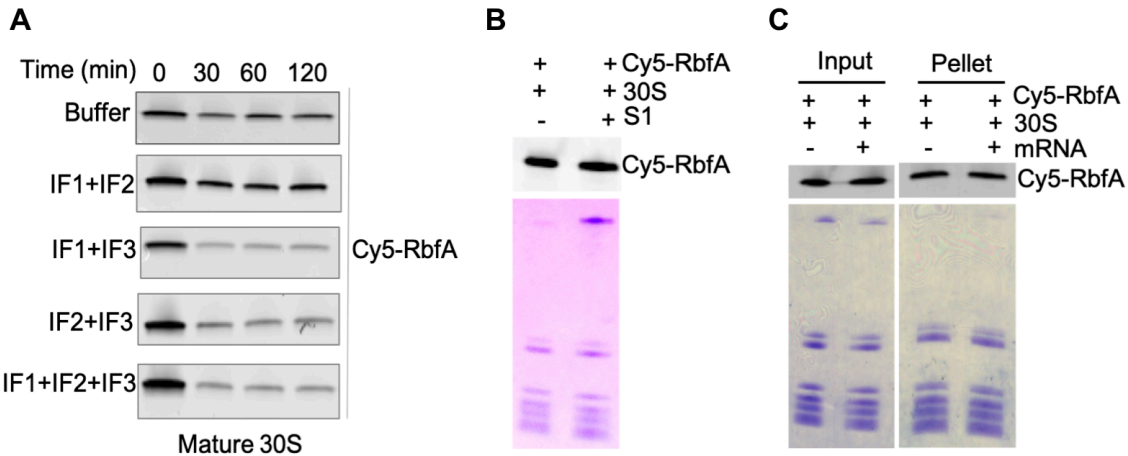

**Figure S2. Other 30SIC components do not release RbfA.**

(A) Ultrafiltration assays showing the kinetics of release of Cy5-RbfA from mature 30S subunits in the presence of buffer or combinations of IF1, IF2 and IF3. The retentates were analyzed by SDS-PAGE and scanned for Cy5 intensity as described in the Methods (also see Figure 1). The “0” min sample was filtered once to remove excess free Cy5-RbfA at the start of the assay. In the following lanes, the sample was filtered again at 30, 60 and 120 min to remove any RbfA that dissociated during this period. Top, the RbfA•30S complex is stable for 2 h in the absence of release factors. Lower panels, the presence of IF1 and IF2 had no effect on the release activity of IF3. (B) An ultrafiltration assay showing that addition of excess ribosomal protein bS1 (4  $\mu$ M) cannot displace Cy5-RbfA from 30S subunits. The retentate was resolved on a 4-20% SDS-PAGE and scanned for Cy5 intensity (top) or stained with Coomassie (bottom). (C) A pelleting assay showing that *sodB* mRNA (0.4  $\mu$ M), which contains a strong Shine-Dalgarno sequence, cannot displace Cy5-RbfA from 30S subunits.

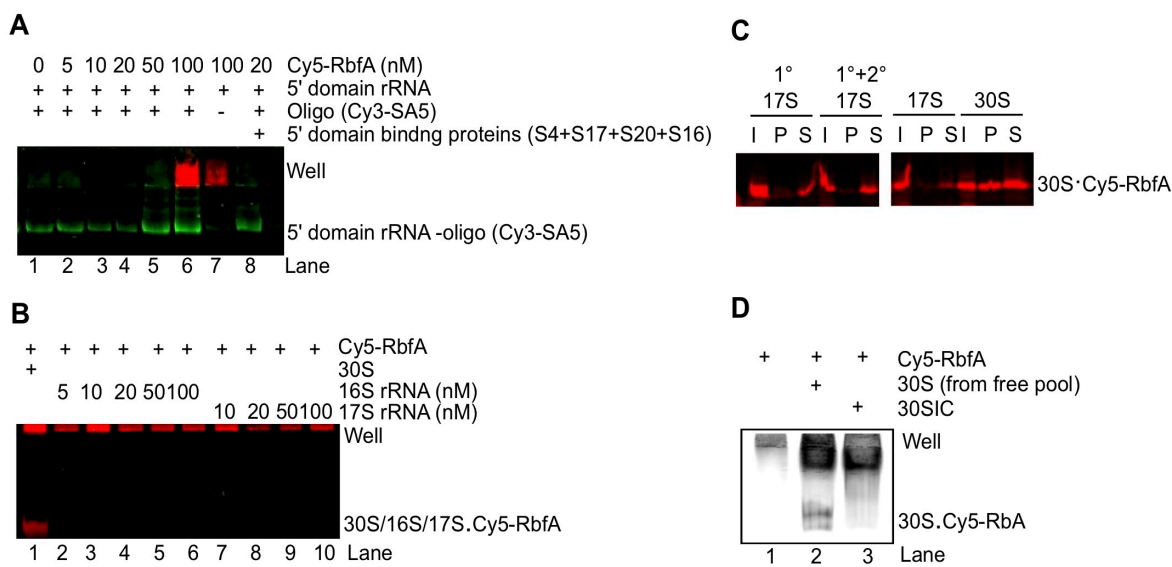

**Figure S3. Early 30S assembly complexes are not recognized by RbfA.**

(A) Native 4% PAGE showing that Cy5-RbfA cannot bind with the 5' domain of 16S rRNA. 5' domain RNA (15 nM) with a 3' extension was hybridized with a complementary Cy3-SA5 DNA oligomer (10 nM) as previously described (15, 16). 5' domain RNA•Cy3-SA5 complexes were incubated without or with an increasing concentration of Cy5-RbfA. Lane 8, reaction includes 2.5  $\mu$ M each 5' domain proteins S4, S17, S20, and S16 (17) to see if they could promote RbfA binding with 5' domain RNA. (B) Native 4% PAGE showing that Cy5-RbfA cannot bind with 16S rRNA (native) and 17S rRNA (transcribed). Lane 1, 30S subunits were used as a control, in which free Cy5-RbfA remains in the well and bound Cy5-RbfA migrates into the gel together with 30S complexes. (C) A pelleting assay showing that Cy5-RbfA cannot bind transcribed 17S rRNA reconstituted with primary (1°) or primary and secondary (1° + 2°) 30S proteins (18). (D) Native 4% PAGE showing that Cy5-RbfA binds free 30S subunits (lane 2) but not translation initiation complexes (30SIC) (lane 3). 30SIC was formed by incubating 30S subunits with initiation factors, mRNA (*sodB*), and fMet-tRNA<sup>fmet</sup> as previously described (19).

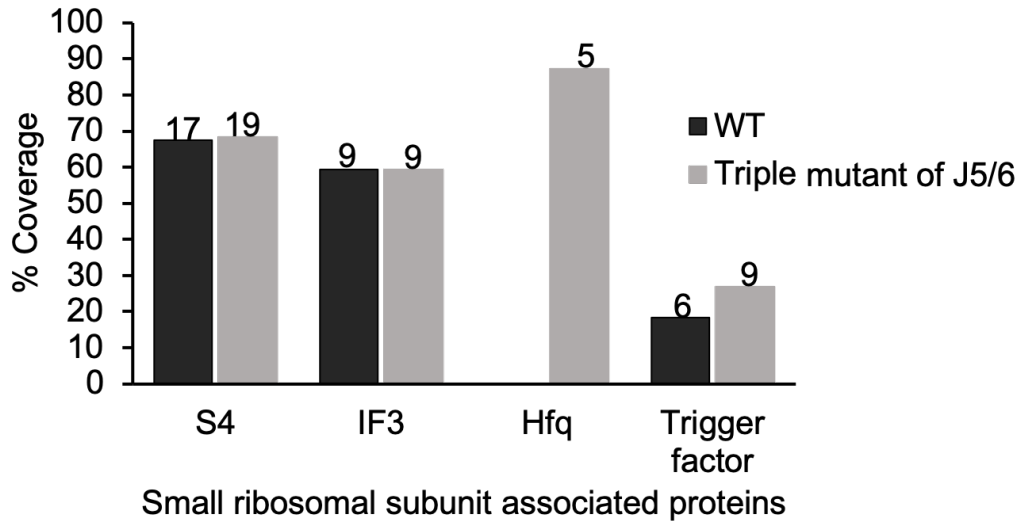

**Figure S4. Detection of IF3 in a pre-30S complex.**

Qualitative mass spectrometry data showing co-purification of IF3 with 30S (black bars) and Off-pathway MS2-tagged pre-30S particles (gray bars). These pre-30S subunits have three mutations (A59, 60C, G107C) in helix junction J5/6 of the 16S rRNA. Data reanalyzed from (20). The number of peptides observed for each protein are shown on the top of respective bar.

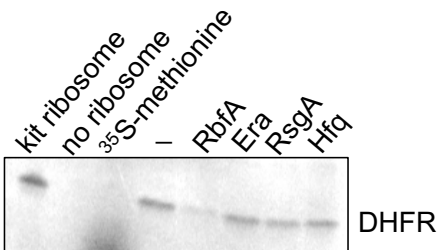

**Figure S5. Measuring translation by pre-30S subunits in the presence of late stage binding 30S assembly factors.**

*In vitro* translation using PURExpress  $\Delta$  ribosome kit (NEB). 0.5  $\mu$ M pre-30S $_{\Delta rbfA}$  subunits were incubated with the components of the kit in a 15  $\mu$ l reaction mixture also containing 0.5  $\mu$ M purified 50S subunits, 1  $\mu$ Ci <sup>35</sup>S-methionine, and 3  $\mu$ M of the indicated assembly factor. Only RbfA inhibited translation by pre-30S subunits.

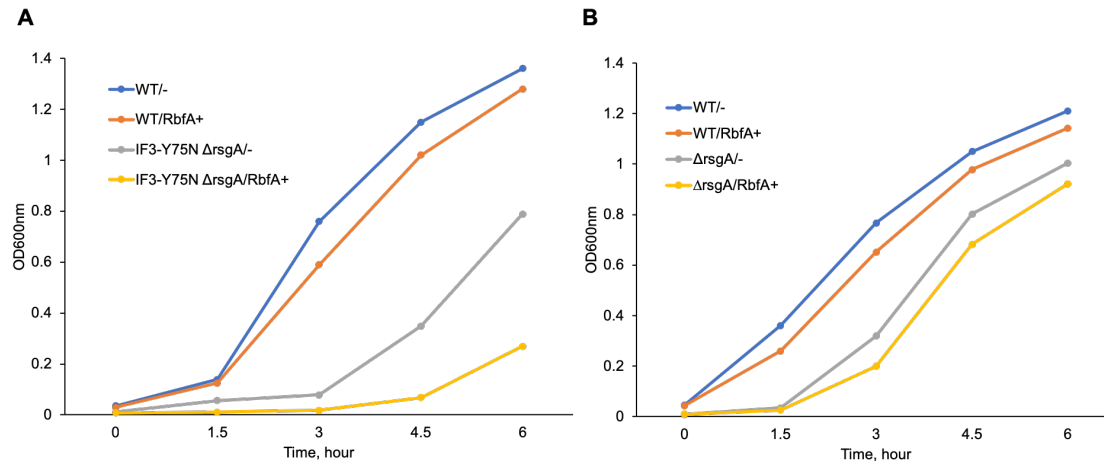

**Figure S6.** Genetic interactions between RsgA and RbfA. (A) Slow growth of *E. coli* IF3-Y75N  $\Delta$ rsgA strain becomes even slower upon overexpression of RbfA. WT, parental; IF3-Y75N  $\Delta$ rsgA, RsgA null mutation in JK378 strain; -, empty vector (pSE420); and RbfA<sup>+</sup>, + p15BHA (RbfA overexpression). (B) RbfA overexpression does not significantly affect cell growth in the absence of RsgA in the *E. coli* IF3 strain. WT, parental;  $\Delta$ rsgA, RsgA null strain; -, empty vector (pMW118); and RbfA<sup>+</sup>, + pMWrbfA<sup>+</sup> (RbfA overexpression). In all cases, cells were grown in LB media with shaking at 37 °C.

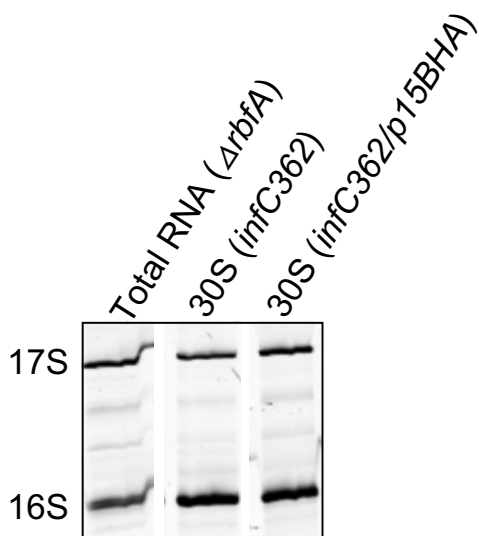

**Figure S7. Processing of 16S rRNA is not impaired by overexpression of RbfA in *infC362* strain.**

Processing of the 16S 5' end was analyzed by primer extension (Cy5-labeled primer 161) and denaturing 8% PAGE. The analysis was done with total cellular RNA (control) or 16S rRNA from 30S complexes (test). A similar proportion of 17S and 16S rRNA was obtained in 30S fractions from *infC362* and *infC362/p15BHA* strains (Figure 5E).

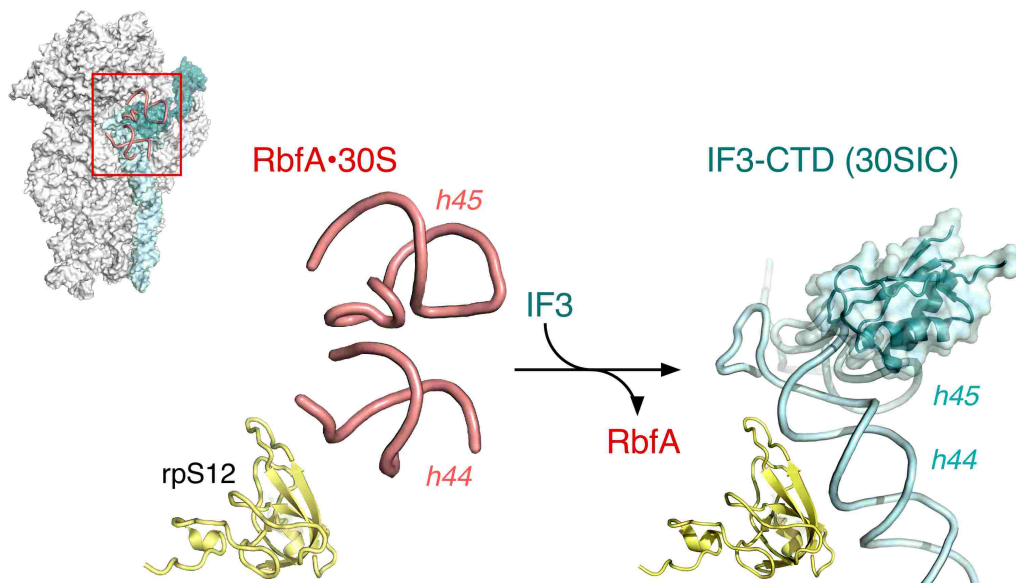

**Figure S8. RbfA and IF3 modulate the conformation of 16S h44 and h45.**

Binding of RbfA unfolds the top of 16S h44 and h45 (salmon) in a low-resolution cryo-EM model of the RbfA•30S complex (21). By contrast, binding of IF3 (teal) and extension of its CTD stabilizes the docked conformation of 16S h44 and h45 (light cyan) in structures of 30S initiation and pre-initiation complexes (22, 23). The opposing actions of RbfA and the IF3 CTD on h44 and h45 may explain how IF3 either promotes dissociation of RbfA or prevents RbfA from rebinding. Ribosomal protein uS12 (yellow) is shown for reference. Inset upper left: 16S fragments modeled into the cryo-EM density map of the 30S•RbfA complex (PDB: 2R1G; (21)) were superimposed on coordinates from a cryo-EM model of 30SIC2 (PDB: 5ME1; (23)). Atoms in 16S h1, h18, and h27 were aligned using PyMOL. Ribbons for IF1, IF2 and fMet-tRNA<sup>init</sup> in the 30SIC2 are not shown for clarity.

**REFERENCES**

1. Xia,B., Ke,H., Shinde,U. and Inouye,M. (2003) The role of RbfA in 16 S rRNA processing and cell growth at low temperature in *Escherichia coli*. *J. Mol. Biol.*, **332**, 575–584.
2. Baba,T., Ara,T., Hasegawa,M., Takai,Y., Okumura,Y., Baba,M., Datsenko,K.A., Tomita,M., Wanner,B.L. and Mori,H. (2006) Construction of *Escherichia coli* K-12 in-frame, single-gene knockout mutants: the Keio collection. *Mol. Syst. Biol.*, **2**, 2006.0008.
3. Campbell,T.L. and Brown,E.D. (2008) Genetic interaction screens with ordered



- overexpression and deletion clone sets implicate the Escherichia coli GTPase YjeQ in late ribosome biogenesis. *J. Bacteriol.*, **190**, 2537–2545.
4. Andrésón,Ó.S. and Davies,J.E. (1980) Some properties of the ribosomal RNA methyltransferase encoded by *ksgA* and the polarity of *ksgA* transcription. *MGG Mol. Gen. Genet.*, **179**, 217–222.
  5. Sussman,J.K., Simons,E.L. and Simons,R.W. (1996) Escherichia coli translation initiation factor 3 discriminates the initiation codon in vivo. *Mol. Microbiol.*, **21**, 347–360.
  6. Dammel,C.S. and Noller,H.F. (1995) Suppression of a cold-sensitive mutation in 16S rRNA by overexpression of a novel ribosome-binding factor, RbfA. *Genes Dev.*, **9**, 626–637.
  7. Goto,S., Kato,S., Kimura,T., Muto,A. and Himeno,H. (2011) RsgA releases RbfA from 30S ribosome during a late stage of ribosome biosynthesis. *EMBO J.*, **30**, 104–114.
  8. Simms,C.L., Hudson,B.H., Mosior,J.W., Rangwala,A.S. and Zaher,H.S. (2014) An active role for the ribosome in determining the fate of oxidized mRNA. *Cell Rep.*, **9**, 1256–1264.
  9. Brunelle,J.L., Youngman,E.M., Sharma,D. and Green,R. (2006) The interaction between C75 of tRNA and the A loop of the ribosome stimulates peptidyl transferase activity. *RNA*, **12**, 33–39.
  10. Elvekrog,M.M. and Gonzalez,R.L. (2013) Conformational selection of translation initiation factor 3 signals proper substrate selection. *Nat. Struct. Mol. Biol.*, **20**, 628–633.
  11. Moazed,D., Stern,S. and Noller,H.F. (1986) Rapid chemical probing of conformation in 16 S ribosomal RNA and 30 S ribosomal subunits using primer extension. *J. Mol. Biol.*, **187**, 399–416.
  12. Seistrup,K.H., Rose,S., Birkedal,U., Nielsen,H., Huber,H. and Douthwaite,S. (2017) Bypassing rRNA methylation by RsmA/Dim1 during ribosome maturation in the hyperthermophilic archaeon Nanoarchaeum equitans. *Nucleic Acids Res.*, **45**, 2007–2015.
  13. ClatterbuckSoper,S., Dator,R., Limbach,P. and Woodson,S. (2013) InVivo X-Ray footprinting of pre-30S ribosomes reveals chaperone-dependent remodeling of late assembly intermediates. *Mol. Cell*, **52**, 506–516.
  14. Shetty,S. and Varshney,U. (2016) An evolutionarily conserved element in initiator tRNAs prompts ultimate steps in ribosome maturation. *Proc. Natl. Acad. Sci.*, **113**, E6126–E6134.
  15. Kim,H., Abeysirigunawardena,S.C., Chen,K., Mayerle,M., Ragunathan,K., Luthey-Schulten,Z., Ha,T. and Woodson,S.A. (2014) Protein-guided RNA dynamics during early ribosome assembly. *Nature*, **506**, 334–338.
  16. Abeysirigunawardena,S.C. and Woodson,S.A. (2015) Differential effects of ribosomal proteins and Mg<sup>2+</sup> ions on a conformational switch during 30S ribosome 5'-domain assembly. *RNA*, **21**, 1859–1865.
  17. Abeysirigunawardena,S.C., Kim,H., Lai,J., Ragunathan,K., Rappé,M.C., Luthey-Schulten,Z., Ha,T. and Woodson,S.A. (2017) Evolution of protein-coupled RNA dynamics during hierarchical assembly of ribosomal complexes. *Nat. Commun.*, **8**, 492.
  18. Culver,G.M. and Noller,H.F. (1999) Efficient reconstitution of functional Escherichia

- coli 30S ribosomal subunits from a complete set of recombinant small subunit ribosomal proteins. *RNA*, **5**, 832–843.
19. Julián,P., Milon,P., Agirrezabala,X., Lasso,G., Gil,D., Rodnina,M. V. and Valle,M. (2011) The cryo-EM structure of a complete 30S translation initiation complex from *Escherichia coli*. *PLoS Biol.*, **9**, e1001095.
  20. Sharma,I.M., Rappé,M.C., Addepalli,B., Grabow,W.W., Zhuang,Z., Abeyvirigunawardena,S.C., Limbach,P.A., Jaeger,L. and Woodson,S.A. (2018) A metastable rRNA junction essential for bacterial 30S biogenesis. *Nucleic Acids Res.*, **46**, 5182–5194.
  21. Datta,P.P., Wilson,D.N., Kawazoe,M., Swami,N.K., Kaminishi,T., Sharma,M.R., Booth,T.M., Takemoto,C., Fucini,P., Yokoyama,S., *et al.* (2007) Structural aspects of RbfA action during small ribosomal subunit assembly. *Mol. Cell*, **28**, 434–445.
  22. Hussain,T., Llácer,J.L., Wimberly,B.T., Kieft,J.S. and Ramakrishnan,V. (2016) Large-scale movements of IF3 and tRNA during bacterial translation initiation. *Cell*, **167**, 133-144.
  23. López-Alonso,J.P., Fabbretti,A., Kaminishi,T., Iturrioz,I., Brandi,L., Gil-Carton,D., Gualerzi,C.O., Fucini,P. and Connell,S.R. (2017) Structure of a 30S pre-initiation complex stalled by GE81112 reveals structural parallels in bacterial and eukaryotic protein synthesis initiation pathways. *Nucleic Acids Res.*, **45**, 2179–2187.
